# Supplementary material
Source: HighWire-hosted journal article supplement (https://sit.bmj.com/highwire/filestream/210/field_highwire_adjunct_files/0/bmjsit-2020-000058supp001_data_supplement.pdf)
Supplement: bmjsit-2020-000058supp001_data_supplement.pdf [file bmjsit-2020-000058supp001_data_supplement.pdf]

**Supplemental Appendix****Appendix table 1**

| <b>Category</b>                                                                           | <b>Code Type</b> | <b>Code</b>                             | <b>Description</b>                                                  |
|-------------------------------------------------------------------------------------------|------------------|-----------------------------------------|---------------------------------------------------------------------|
| Pericarditis (which includes all diagnoses of pericarditis that were not intervened upon) | ICD9-DX          | 420.0                                   | Acute Pericarditis in diseases classified elsewhere                 |
|                                                                                           | ICD10-DX         | I30.0                                   | Acute nonspecific idiopathic pericarditis                           |
|                                                                                           | ICD9-DX          | 420.90                                  | Acute pericarditis, unspecified                                     |
|                                                                                           | ICD9-DX          | 420.91                                  | Acute idiopathic pericarditis                                       |
|                                                                                           | ICD9-DX          | 420.99                                  | Other acute pericarditis                                            |
|                                                                                           | ICD9-DX          | 423.0                                   | Hemopericardium                                                     |
|                                                                                           | ICD9-DX          | 423.1                                   | Adhesive pericarditis                                               |
|                                                                                           | ICD9-DX          | 423.2                                   | Constrictive pericarditis                                           |
|                                                                                           | ICD9-DX          | 423.8                                   | Other specified diseases of pericardium                             |
|                                                                                           | ICD9-DX          | 423.9                                   | Unspecified disease of the pericardium                              |
|                                                                                           | ICD10-DX         | I30.0                                   | Acute nonspecific idiopathic pericarditis                           |
|                                                                                           | ICD10-DX         | I30.1                                   | Infective pericarditis                                              |
|                                                                                           | ICD10-DX         | I30.8                                   | Other forms of acute pericarditis                                   |
|                                                                                           | ICD10-DX         | I30.9                                   | Acute pericarditis, unspecified                                     |
|                                                                                           | ICD10-DX         | I31.2                                   | Hemopericardium, not elsewhere specified                            |
|                                                                                           | ICD10-DX         | I31.3                                   | Pericardial effusion (noninflammatory)                              |
|                                                                                           | ICD10-DX         | I31.8                                   | Other specified diseases of the pericardium                         |
| ICD10-DX                                                                                  | I31.9            | Disease of the pericardium, unspecified |                                                                     |
| Tamponade or intervention                                                                 | ICD-9 DX         | 423.9                                   | Cardiac Tamponade                                                   |
|                                                                                           | ICD-10 DX        | I31.4                                   | Cardiac Tamponade                                                   |
|                                                                                           | ICD-9 PX         | 37.0                                    | Pericardiocentesis                                                  |
|                                                                                           | ICD-10 PX        | 0W9C30Z                                 | Drainage of Mediastinum with Drainage Device, Percutaneous Approach |
|                                                                                           | ICD-10 PX        | 0W9C3ZZ                                 | Drainage of Mediastinum, Percutaneous Approach                      |

|           |         |                                                                                       |
|-----------|---------|---------------------------------------------------------------------------------------|
| ICD-10 PX | 0W9D30Z | Drainage of Pericardial Cavity with Drainage Device, Percutaneous Approach            |
| ICD-10 PX | 0W9D3ZX | Drainage of Pericardial Cavity, Percutaneous Approach, Diagnostic                     |
| ICD-10 PX | 0W9D3ZZ | Drainage of Pericardial Cavity, Percutaneous Approach                                 |
| ICD-10 PX | 0W9D40Z | Drainage of Pericardial Cavity with Drainage Device, Percutaneous Endoscopic Approach |
| ICD-10 PX | 0W9D4ZX | Drainage of Pericardial Cavity, Percutaneous Endoscopic Approach, Diagnostic          |
| ICD-10 PX | 0W9D4ZZ | Drainage of Pericardial Cavity, Percutaneous Endoscopic Approach                      |
| CPT       | 33010   | Pericardiocentesis; initial                                                           |
| CPT       | 33011   | Pericardiocentesis; subsequent                                                        |
| CPT       | G9408   | Patients with cardiac tamponade and/or pericardiocentesis occurring within 30 days    |
| CPT       | G9409   | Patients without cardiac tamponade and/or pericardiocentesis occurring within 30 days |
| ICD-9 PX  | 37.10   | Incision of Heart, Not Otherwise Specified                                            |
| ICD-10 PX | 02N60ZZ | Release Right Atrium, Open Approach                                                   |
| ICD-10 PX | 02N63ZZ | Release Right Atrium, Percutaneous Approach                                           |
| ICD-10 PX | 02N64ZZ | Release Right Atrium, Percutaneous Endoscopic Approach                                |
| ICD-10 PX | 02N70ZZ | Release Left Atrium, Open Approach                                                    |
| ICD-10 PX | 02N73ZZ | Release Left Atrium, Percutaneous Approach                                            |
| ICD-10 PX | 02N74ZZ | Release Left Atrium, Percutaneous Endoscopic Approach                                 |
| ICD-9 PX  | 37.11   | Cardiotomy                                                                            |
| ICD-10 PX | 02C60ZZ | Extirpation of Matter from Right Atrium, Open Approach                                |
| ICD-10 PX | 02C63ZZ | Extirpation of Matter from Right Atrium, Percutaneous Approach                        |
| ICD-10 PX | 02C64ZZ | Extirpation of Matter from Right Atrium, Percutaneous Endoscopic Approach             |
| ICD-10 PX | 02C70ZZ | Extirpation of Matter from Left Atrium, Open Approach                                 |

|           |         |                                                                          |
|-----------|---------|--------------------------------------------------------------------------|
| ICD-10 PX | 02C73ZZ | Extirpation of Matter from Left Atrium, Percutaneous Approach            |
| ICD-10 PX | 02C74ZZ | Extirpation of Matter from Left Atrium, Percutaneous Endoscopic Approach |
| ICD-10 PX | 02PA0YZ | Removal of Other Device from Heart, Open Approach                        |
| ICD-10 PX | 02PA4YZ | Removal of Other Device from Heart, Percutaneous Endoscopic Approach     |
| ICD-10 PX | 02WA0YZ | Revision of Other Device in Heart, Open Approach                         |
| ICD-10 PX | 02WA3YZ | Revision of Other Device in Heart, Percutaneous Approach                 |
| ICD-10 PX | 02WA4YZ | Revision of Other Device in Heart, Percutaneous Endoscopic Approach      |
| CPT       | 33310   | Cardiotomy, exploratory                                                  |
| CPT       | 33315   | Cardiotomy, exploratory with cardiopulmonary bypass                      |
| ICD-9 PX  | 37.12   | Pericardiotomy                                                           |
| ICD-10 PX | 02CN0ZZ | Extirpation of Matter from Pericardium, Open Approach                    |
| ICD-10 PX | 02CN3ZZ | Extirpation of Matter from Pericardium, Percutaneous Approach            |
| ICD-10 PX | 02CN4ZZ | Extirpation of Matter from Pericardium, Percutaneous Endoscopic Approach |
| ICD-10 PX | 02NN0ZZ | Release Pericardium, Open Approach                                       |
| ICD-10 PX | 02NN3ZZ | Release Pericardium, Percutaneous Approach                               |
| ICD-10 PX | 02NN4ZZ | Release Pericardium, Percutaneous Endoscopic Approach                    |
| ICD-10 PX | 0W9D00Z | Drainage of Pericardial Cavity with Drainage Device, Open Approach       |
| ICD-10 PX | 0W9D0ZX | Drainage of Pericardial Cavity, Open Approach, Diagnostic                |
| ICD-10 PX | 0W9D0ZZ | Drainage of Pericardial Cavity, Open Approach                            |
| ICD-10 PX | 0WCD0ZZ | Extirpation of Matter from Pericardial Cavity, Open Approach             |
| ICD-10 PX | 0WCD3ZZ | Extirpation of Matter from Pericardial Cavity, Percutaneous Approach     |

|           |         |                                                                                 |
|-----------|---------|---------------------------------------------------------------------------------|
| ICD-10 PX | 0WCD4ZZ | Extirpation of Matter from Pericardial Cavity, Percutaneous Endoscopic Approach |
| ICD-9 PX  | 37.24   | Biopsy of Pericardium                                                           |
| ICD-10 PX | 02BN0ZX | Excision of Pericardium, Open Approach, Diagnostic                              |
| ICD-10 PX | 02BN3ZX | Excision of Pericardium, Percutaneous Approach, Diagnostic                      |
| ICD-10 PX | 02BN4ZX | Excision of Pericardium, Percutaneous Endoscopic Approach, Diagnostic           |
| ICD-9 PX  | 37.31   | Pericardiectomy                                                                 |
| ICD-10 PX | 02BN0ZZ | Excision of Pericardium, Open Approach                                          |
| ICD-10 PX | 02BN3ZZ | Excision of Pericardium, Percutaneous Approach                                  |
| ICD-10 PX | 02BN4ZZ | Excision of Pericardium, Percutaneous Endoscopic Approach                       |
| ICD-10 PX | 02TN0ZZ | Resection of Pericardium, Open Approach                                         |
| ICD-10 PX | 02TN3ZZ | Resection of Pericardium, Percutaneous Approach                                 |
| ICD-10 PX | 02TN4ZZ | Resection of Pericardium, Percutaneous Endoscopic Approach                      |
| ICD-9 PX  | 37.49   | Other Repair of Heart and Pericardium                                           |
| ICD-10 PX | 02163Z7 | Bypass Right Atrium to Left Atrium, Percutaneous Approach                       |
| ICD-10 PX | 02H60YZ | Insertion of Other Device into Right Atrium, Open Approach                      |
| ICD-10 PX | 02H63YZ | Insertion of Other Device into Right Atrium, Percutaneous Approach              |
| ICD-10 PX | 02H64YZ | Insertion of Other Device into Right Atrium, Percutaneous Endoscopic Approach   |
| ICD-10 PX | 02H70YZ | Insertion of Other Device into Left Atrium, Open Approach                       |
| ICD-10 PX | 02H73YZ | Insertion of Other Device into Left Atrium, Percutaneous Approach               |
| ICD-10 PX | 02H74YZ | Insertion of Other Device into Left Atrium, Percutaneous Endoscopic Approach    |

|           |         |                                                                                  |
|-----------|---------|----------------------------------------------------------------------------------|
| ICD-10 PX | 02HA0YZ | Insertion of Other Device into Heart, Open Approach                              |
| ICD-10 PX | 02HA3YZ | Insertion of Other Device into Heart, Percutaneous Approach                      |
| ICD-10 PX | 02HA4YZ | Insertion of Other Device into Heart, Percutaneous Endoscopic Approach           |
| ICD-10 PX | 02HK0YZ | Insertion of Other Device into Right Ventricle, Open Approach                    |
| ICD-10 PX | 02HK3YZ | Insertion of Other Device into Right Ventricle, Percutaneous Approach            |
| ICD-10 PX | 02HK4YZ | Insertion of Other Device into Right Ventricle, Percutaneous Endoscopic Approach |
| ICD-10 PX | 02HL0YZ | Insertion of Other Device into Left Ventricle, Open Approach                     |
| ICD-10 PX | 02HL3YZ | Insertion of Other Device into Left Ventricle, Percutaneous Approach             |
| ICD-10 PX | 02HL4YZ | Insertion of Other Device into Left Ventricle, Percutaneous Endoscopic Approach  |
| ICD-10 PX | 02HN0YZ | Insertion of Other Device into Pericardium, Open Approach                        |
| ICD-10 PX | 02HN3YZ | Insertion of Other Device into Pericardium, Percutaneous Approach                |
| ICD-10 PX | 02HN4YZ | Insertion of Other Device into Pericardium, Percutaneous Endoscopic Approach     |
| ICD-10 PX | 02QA0ZZ | Repair Heart, Open Approach                                                      |
| ICD-10 PX | 02QA3ZZ | Repair Heart, Percutaneous Approach                                              |
| ICD-10 PX | 02QA4ZZ | Repair Heart, Percutaneous Endoscopic Approach                                   |
| ICD-10 PX | 02QN0ZZ | Repair Pericardium, Open Approach                                                |
| ICD-10 PX | 02QN3ZZ | Repair Pericardium, Percutaneous Approach                                        |
| ICD-10 PX | 02QN4ZZ | Repair Pericardium, Percutaneous Endoscopic Approach                             |
| ICD-9 PX  | 37.91   | Open Chest Cardiac Massage                                                       |
| ICD-10 PX | 02QA0ZZ | Repair Heart, Open Approach                                                      |

|           |         |                                                                                  |
|-----------|---------|----------------------------------------------------------------------------------|
| CPT       | 33015   | Tube pericardiostomy                                                             |
| CPT       | 33300   | Repair of cardiac wound, without bypass                                          |
| CPT       | 33305   | Repair of cardiac wound with cardiopulmonary bypass                              |
| ICD-9 PX  | 37.93   | Injection of Therapeutic Substance into Pericardium                              |
| ICD-10 PX | 3E080GC | Introduction of Other Therapeutic Substance into Heart,<br>Open Approach         |
| ICD-10 PX | 3E083GC | Introduction of Other Therapeutic Substance into Heart,<br>Percutaneous Approach |

\*Stroke/TIA codes are contained in Appendix Table 2

**Appendix table 2.**

| Logic Code | Description                               | Code Type | Codes    | Description                                                 | Additional Logic |
|------------|-------------------------------------------|-----------|----------|-------------------------------------------------------------|------------------|
| A1         | Atrioesophageal fistula                   | ICD-9 DX  | 530.89   | Other specified disorders of esophagus                      |                  |
|            |                                           | ICD-10 DX | K22.8    | Other specified diseases of esophagus                       |                  |
| A2         | Esophageal Injury/<br>Esophageal hematoma | ICD-9 DX  | 862.22   | Injury to esophagus without mention of open wound in cavity |                  |
|            |                                           | ICD-9 DX  | 998.6    | Persistent postoperative fistula                            |                  |
|            |                                           | ICD-9 DX  | 530.4    | Perforation of esophagus                                    |                  |
|            |                                           | ICD-9 PX  | 42.84    | Repair of esophageal fistula, not elsewhere classified      |                  |
|            |                                           | ICD-10 DX | S27.81xx | Injury of esophagus (thoracic part)                         |                  |
|            |                                           | ICD-10 DX | T81.83XA | Persistent postprocedural fistula, initial encounter        |                  |
|            |                                           | ICD-10 DX | K22.3    | Perforation of esophagus                                    |                  |
|            |                                           | ICD-10 DX | J95.04   | Tracheo-esophageal fistula following tracheostomy           |                  |
| B          | Esophageal Surgery/<br>Resection          | ICD-9 PX  | 42.4     | Excision of esophagus                                       |                  |
|            |                                           | ICD-9 PX  | 42.41    | Partial esophagectomy                                       |                  |
|            |                                           | ICD-9 PX  | 42.42    | Total esophagectomy                                         |                  |
|            |                                           | ICD-9 PX  | 42.84    | Repair of esophageal fistula, not elsewhere classified      |                  |
|            |                                           | ICD-9 PX  | 42.82    | Suture of laceration of esophagus                           |                  |
|            |                                           | ICD-9 PX  | 43.9     | Total gastrectomy                                           |                  |
|            |                                           | ICD-9 PX  | 43.5     | Partial gastrectomy with anastomosis to esophagus           |                  |
|            |                                           | ICD-10 PX | 0DB50ZZ  | Excision of Esophagus, Open Approach                        |                  |
|            |                                           | ICD-10 PX | 0DB53ZZ  | Excision of Esophagus, Percutaneous Approach                |                  |

|   |                     |           |         |                                                              |
|---|---------------------|-----------|---------|--------------------------------------------------------------|
|   |                     | ICD-10 PX | 0DB57ZZ | Excision of Esophagus, Via Natural or Artificial Opening     |
|   |                     | ICD-10 PX | 0DT50ZZ | Resection of Esophagus, Open Approach                        |
|   |                     | ICD-10 PX | 0DT54ZZ | Resection of Esophagus, Percutaneous Endoscopic Approach     |
|   |                     | ICD-10 PX | 0DT57ZZ | Resection of Esophagus, Via Natural or Artificial Opening    |
|   |                     | ICD-10 PX | 0DT58ZZ | Resection of Esophagus, Endo                                 |
|   |                     | ICD-10 PX | 0DB40ZZ | Excision of Esophagogastric Junction, Open Approach          |
|   |                     | ICD-10 PX | 0DB43ZZ | Excision of Esophagogastric Junction, Percutaneous Approach  |
|   |                     | ICD-10 PX | 0DB44ZZ | Excision of Esophagogastric Junction, Perc Endo Approach     |
|   |                     | ICD-10 PX | 0DB47ZZ | Excision of Esophagogastric Junction, Via Opening            |
|   |                     | ICD-10 PX | 0DT40ZZ | Resection of Esophagogastric Junction, Open Approach         |
|   |                     | ICD-10 PX | 0DT44ZZ | Resection of Esophagogastric Junction, Perc Endo Approach    |
|   |                     | ICD-10 PX | 0DT47ZZ | Resection of Esophagogastric Junction, Via Opening           |
|   |                     | ICD-10 PX | 0DT48ZZ | Resection of Esophagogastric Junction, Endo                  |
|   |                     | ICD-10 PX | 0DQ50ZZ | Repair Esophagus, Open Approach                              |
|   |                     | ICD-9 PX  | 42.81   | Insertion of permanent tube into esophagus                   |
|   |                     | ICD-10 PX | 0DH50DZ | Insertion of Intraluminal Device into Esophag, Open Approach |
| C | Esophageal stenting | ICD-10 PX | 0DH50UZ | Insertion of Feeding Device into Esophagus, Open Approach    |
|   |                     | ICD-10 PX | 0DH53DZ | Insertion of Intraluminal Device into Esophag, Perc Approach |



|   |                                  |           |         |                                                                                                                                                                                                  |
|---|----------------------------------|-----------|---------|--------------------------------------------------------------------------------------------------------------------------------------------------------------------------------------------------|
|   |                                  | ICD-10 PX | ODH53UZ | Insertion of Feeding Device into Esophagus, Perc Approach                                                                                                                                        |
|   |                                  | ICD-10 PX | ODH54DZ | Insertion of Intralum Dev into Esophag, Perc Endo Approach                                                                                                                                       |
|   |                                  | ICD-10 PX | ODH54UZ | Insertion of Feeding Device into Esophag, Perc Endo Approach                                                                                                                                     |
|   |                                  | ICD-10 PX | ODH57DZ | Insertion of Intraluminal Device into Esophagus, Via Opening                                                                                                                                     |
|   |                                  | ICD-10 PX | ODH57UZ | Insertion of Feeding Device into Esophagus, Via Opening                                                                                                                                          |
|   |                                  | ICD-10 PX | ODH58DZ | Insertion of Intraluminal Device into Esophagus, Endo                                                                                                                                            |
|   |                                  | ICD-10 PX | ODH58UZ | Insertion of Feeding Device into Esophagus, Endo Esophagoscopy, flexible, transoral; with placement of endoscopic stent (includes pre- and post-dilation and guide wire passage, when performed) |
|   |                                  | CPT       | 43212   | Esophagogastroduodenoscopy, flexible, transoral; with placement of endoscopic stent (includes pre- and post-dilation and guide wire passage, when performed)                                     |
|   |                                  | CPT       | 43266   | Esophagogastroduodenoscopy, flexible, transoral; with placement of endoscopic stent (includes pre- and post-dilation and guide wire passage, when performed)                                     |
| D | Mediastinal infection            | ICD-9 DX  | 519.2   | Mediastinitis                                                                                                                                                                                    |
|   |                                  | ICD-9 DX  | 519.3   | Other diseases of mediastinum, not elsewhere classified                                                                                                                                          |
|   |                                  | ICD-10 DX | J98.51  | Mediastinitis                                                                                                                                                                                    |
|   |                                  | ICD-10 DX | J98.59  | Other diseases of mediastinum, not elsewhere classified                                                                                                                                          |
| E | Air Embolism (pulmonary/cardiac) | ICD-9 DX  | 999.1   | Air embolism as a complication of medical care, not elsewhere classified                                                                                                                         |
|   |                                  | ICD-9 DX  | 909.3   | Late effect of complications of surgical and medical care                                                                                                                                        |

|   |             |           |          |                                                                                                |                                                                                                                         |
|---|-------------|-----------|----------|------------------------------------------------------------------------------------------------|-------------------------------------------------------------------------------------------------------------------------|
|   |             | ICD-10 DX | T80.0XXA | Air embolism following infusion, transfusion and therapeutic injection, initial encounter      |                                                                                                                         |
|   |             | ICD-10 DX | T80.0XXD | Air embolism following infusion, transfusion and therapeutic injection, subsequent encounter   |                                                                                                                         |
|   |             | ICD-10 DX | T80.0XXS | Air embolism following infusion, transfusion and therapeutic injection, sequela                |                                                                                                                         |
| F | Hematemesis | ICD-10 DX | K92.0    | Hematemesis                                                                                    |                                                                                                                         |
|   |             | ICD-9 DX  | 430      | Subarachnoid hemorrhage                                                                        |                                                                                                                         |
|   |             | ICD-9 DX  | 431      | Intracerebral hemorrhage                                                                       |                                                                                                                         |
|   |             | ICD-9 DX  | 433.01   | Occlusion and stenosis of basilar artery with cerebral infarction                              |                                                                                                                         |
|   |             | ICD-9 DX  | 433.10   | Occlusion and stenosis of carotid artery without mention of cerebral infarction                | EXCLUSION: If any of the qualifying claims have:                                                                        |
|   |             | ICD-9 DX  | 433.11   | Occlusion and stenosis of carotid artery with cerebral infarction                              | 800 <= DX Code <= 804.9, 850 <= DX Code <= 854.1 in any DX position OR DX V57xx as the principal DX Code, then EXCLUDE. |
|   |             | ICD-9 DX  | 433.21   | Occlusion and stenosis of vertebral artery with cerebral infarction                            |                                                                                                                         |
| G | Stroke/TIA  | ICD-9 DX  | 433.31   | Occlusion and stenosis of multiple and bilateral precerebral arteries with cerebral infarction |                                                                                                                         |
|   |             | ICD-9 DX  | 433.81   | Occlusion and stenosis of other specified precerebral artery with cerebral infarction          |                                                                                                                         |
|   |             | ICD-9 DX  | 433.91   | Occlusion and stenosis of unspecified precerebral artery with cerebral infarction              |                                                                                                                         |
|   |             | ICD-9 DX  | 434.00   | Cerebral thrombosis without mention of cerebral infarction                                     |                                                                                                                         |
|   |             | ICD-9 DX  | 434.01   | Cerebral thrombosis with cerebral infarction                                                   |                                                                                                                         |
|   |             | ICD-9 DX  | 434.10   | Cerebral embolism without mention of cerebral infarction                                       |                                                                                                                         |
|   |             | ICD-9 DX  | 434.11   | Cerebral embolism with cerebral infarction                                                     |                                                                                                                         |

|           |        |                                                                               |                                                                                                                                                                                                                                               |
|-----------|--------|-------------------------------------------------------------------------------|-----------------------------------------------------------------------------------------------------------------------------------------------------------------------------------------------------------------------------------------------|
| ICD-9 DX  | 434.90 | Cerebral artery occlusion, unspecified without mention of cerebral infarction |                                                                                                                                                                                                                                               |
| ICD-9 DX  | 434.91 | Cerebral artery occlusion, unspecified with cerebral infarction               |                                                                                                                                                                                                                                               |
| ICD-9 DX  | 435.0  | Basilar artery syndrome                                                       |                                                                                                                                                                                                                                               |
| ICD-9 DX  | 435.1  | Vertebral artery syndrome                                                     |                                                                                                                                                                                                                                               |
| ICD-9 DX  | 435.3  | Vertebrobasilar artery syndrome                                               |                                                                                                                                                                                                                                               |
| ICD-9 DX  | 435.8  | Other specified transient cerebral ischemias                                  |                                                                                                                                                                                                                                               |
| ICD-9 DX  | 435.9  | Unspecified transient cerebral ischemia                                       |                                                                                                                                                                                                                                               |
| ICD-9 DX  | 436    | Acute, but ill-defined, cerebrovascular disease                               |                                                                                                                                                                                                                                               |
| ICD-9 DX  | 997.02 | iatrogenic cerebrovascular infarction or hemorrhage                           |                                                                                                                                                                                                                                               |
| ICD-10 DX | G45.0  | Vertebro-basilar artery syndrome                                              | EXCLUSION: If any of the qualifying claims have any of the following codes in any DX position then EXCLUDE:<br>S01.90XA,<br>S02.0XXA,<br>S02.0XXB,<br>S02.10XA,<br>S02.10XB,<br>S02.101A,<br>S02.101B,<br>S02.102A,<br>S02.102B,<br>S02.109A, |
| ICD-10 DX | G45.1  | Carotid artery syndrome (hemispheric)                                         |                                                                                                                                                                                                                                               |
| ICD-10 DX | G45.2  | Multiple and bilateral precerebral artery syndromes                           |                                                                                                                                                                                                                                               |
| ICD-10 DX | G45.8  | Other transient cerebral ischemic attacks and related syndromes               |                                                                                                                                                                                                                                               |
| ICD-10 DX | G45.9  | Transient cerebral ischemic attack, unspecified                               |                                                                                                                                                                                                                                               |
| ICD-10 DX | G46.0  | Middle cerebral artery syndrome                                               |                                                                                                                                                                                                                                               |
| ICD-10 DX | G46.1  | Anterior cerebral artery syndrome                                             |                                                                                                                                                                                                                                               |
| ICD-10 DX | G46.2  | Posterior cerebral artery syndrome                                            |                                                                                                                                                                                                                                               |
| ICD-10 DX | G46.3  | Brain stem stroke syndrome                                                    |                                                                                                                                                                                                                                               |
| ICD-10 DX | G46.4  | Cerebellar stroke syndrome                                                    |                                                                                                                                                                                                                                               |
| ICD-10 DX | G46.5  | Pure motor lacunar syndrome                                                   |                                                                                                                                                                                                                                               |
| ICD-10 DX | G46.6  | Pure sensory lacunar syndrome                                                 |                                                                                                                                                                                                                                               |
| ICD-10 DX | G46.7  | Other lacunar syndromes                                                       |                                                                                                                                                                                                                                               |
| ICD-10 DX | G46.8  | Other vascular syndromes of brain in cerebrovascular diseases                 |                                                                                                                                                                                                                                               |

|           |        |                                                                                                                       |                                     |
|-----------|--------|-----------------------------------------------------------------------------------------------------------------------|-------------------------------------|
| ICD-10 DX | G97.31 | Intraoperative hemorrhage and hematoma of a nervous system organ or structure complicating a nervous system procedure | S02.109B,<br>S02.11GA,<br>S02.11GB, |
| ICD-10 DX | G97.32 | Intraoperative hemorrhage and hematoma of a nervous system organ or structure complicating other procedure            | S02.11HA,<br>S02.11HB,<br>S02.110A, |
| ICD-10 DX | I60.00 | Nontraumatic subarachnoid hemorrhage from unspecified carotid siphon and bifurcation                                  | S02.111A,<br>S02.112A,              |
| ICD-10 DX | I60.01 | Nontraumatic subarachnoid hemorrhage from right carotid siphon and bifurcation                                        | S02.113A,<br>S02.110B,              |
| ICD-10 DX | I60.02 | Nontraumatic subarachnoid hemorrhage from left carotid siphon and bifurcation                                         | S02.111B,<br>S02.112B,              |
| ICD-10 DX | I60.10 | Nontraumatic subarachnoid hemorrhage from unspecified middle cerebral artery                                          | S02.113B,<br>S02.118A,              |
| ICD-10 DX | I60.11 | Nontraumatic subarachnoid hemorrhage from right middle cerebral artery                                                | S02.118B,<br>S02.119A,              |
| ICD-10 DX | I60.12 | Nontraumatic subarachnoid hemorrhage from left middle cerebral artery                                                 | S02.119B,<br>S02.19XA,              |
| ICD-10 DX | I60.2  | Nontraumatic subarachnoid hemorrhage from anterior communicating artery                                               | S02.19XB,<br>S02.2XXA,              |
| ICD-10 DX | I60.30 | Nontraumatic subarachnoid hemorrhage from unspecified posterior communicating artery                                  | S02.2XXB,<br>S02.3XXA,              |
| ICD-10 DX | I60.31 | Nontraumatic subarachnoid hemorrhage from right posterior communicating artery                                        | S02.30XA,<br>S02.3XXB,              |
| ICD-10 DX | I60.32 | Nontraumatic subarachnoid hemorrhage from left posterior communicating artery                                         | S02.30XB,<br>S02.31XA,              |
| ICD-10 DX | I60.4  | Nontraumatic subarachnoid hemorrhage from basilar artery                                                              | S02.31XB,<br>S02.32XA,              |
| ICD-10 DX | I60.50 | Nontraumatic subarachnoid hemorrhage from unspecified vertebral artery                                                | S02.32XB,<br>S02.40AA,              |

|           |        |                                                                           |                                     |
|-----------|--------|---------------------------------------------------------------------------|-------------------------------------|
| ICD-10 DX | I60.51 | Nontraumatic subarachnoid hemorrhage from right vertebral artery          | S02.40AB,<br>S02.40BA,              |
| ICD-10 DX | I60.52 | Nontraumatic subarachnoid hemorrhage from left vertebral artery           | S02.40BB,<br>S02.40CA,<br>S02.40CB, |
| ICD-10 DX | I60.6  | Nontraumatic subarachnoid hemorrhage from other intracranial arteries     | S02.40DA,<br>S02.40DB,              |
| ICD-10 DX | I60.7  | Nontraumatic subarachnoid hemorrhage from unspecified intracranial artery | S02.40EA,<br>S02.40EB,              |
| ICD-10 DX | I60.8  | Other nontraumatic subarachnoid hemorrhage                                | S02.40FA,<br>S02.40FB,              |
| ICD-10 DX | I60.9  | Nontraumatic subarachnoid hemorrhage, unspecified                         | S02.400A,<br>S02.400B,              |
| ICD-10 DX | I61.0  | Nontraumatic intracerebral hemorrhage in hemisphere, subcortical          | S02.401A,<br>S02.401B,              |
| ICD-10 DX | I61.1  | Nontraumatic intracerebral hemorrhage in hemisphere, cortical             | S02.402A,<br>S02.402B,              |
| ICD-10 DX | I61.2  | Nontraumatic intracerebral hemorrhage in hemisphere, unspecified          | S02.411A,<br>S02.411B,              |
| ICD-10 DX | I61.3  | Nontraumatic intracerebral hemorrhage in brain stem                       | S02.412A,<br>S02.412B,              |
| ICD-10 DX | I61.4  | Nontraumatic intracerebral hemorrhage in cerebellum                       | S02.413A,<br>S02.413B,              |
| ICD-10 DX | I61.5  | Nontraumatic intracerebral hemorrhage, intraventricular                   | S02.42XA,<br>S02.42XB,              |
| ICD-10 DX | I61.6  | Nontraumatic intracerebral hemorrhage, multiple localized                 | S02.600A,<br>S02.600B,              |
| ICD-10 DX | I61.8  | Other nontraumatic intracerebral hemorrhage                               | S02.601A,<br>S02.601B,              |
| ICD-10 DX | I61.9  | Nontraumatic intracerebral hemorrhage, unspecified                        | S02.602A,                           |
| ICD-10 DX | I63.00 | Cerebral infarction due to thrombosis of unspecified precerebral artery   |                                     |

|           |         |                                                                       |                        |
|-----------|---------|-----------------------------------------------------------------------|------------------------|
| ICD-10 DX | I63.011 | Cerebral infarction due to thrombosis of right vertebral artery       | S02.602B,<br>S02.609A, |
| ICD-10 DX | I63.012 | Cerebral infarction due to thrombosis of left vertebral artery        | S02.609B,<br>S02.61XA, |
| ICD-10 DX | I63.013 | Cerebral infarction due to thrombosis of bilateral vertebral arteries | S02.610A,<br>S02.610B, |
| ICD-10 DX | I63.019 | Cerebral infarction due to thrombosis of unspecified vertebral artery | S02.611A,<br>S02.611B, |
| ICD-10 DX | I63.02  | Cerebral infarction due to thrombosis of basilar artery               | S02.612A,<br>S02.612B, |
| ICD-10 DX | I63.031 | Cerebral infarction due to thrombosis of right carotid artery         | S02.62XA,<br>S02.620A, |
| ICD-10 DX | I63.032 | Cerebral infarction due to thrombosis of left carotid artery          | S02.62XB,<br>S02.620B, |
| ICD-10 DX | I63.039 | Cerebral infarction due to thrombosis of unspecified carotid artery   | S02.621A,<br>S02.621B, |
| ICD-10 DX | I63.09  | Cerebral infarction due to thrombosis of other precerebral artery     | S02.622A,<br>S02.622B, |
| ICD-10 DX | I63.10  | Cerebral infarction due to embolism of unspecified precerebral artery | S02.63XA,<br>S02.630A, |
| ICD-10 DX | I63.111 | Cerebral infarction due to embolism of right vertebral artery         | S02.63XB,<br>S02.630B, |
| ICD-10 DX | I63.112 | Cerebral infarction due to embolism of left vertebral artery          | S02.631A,<br>S02.631B, |
| ICD-10 DX | I63.119 | Cerebral infarction due to embolism of unspecified vertebral artery   | S02.632A,<br>S02.632B, |
| ICD-10 DX | I63.12  | Cerebral infarction due to embolism of basilar artery                 | S02.64XA,<br>S02.640A, |
| ICD-10 DX | I63.131 | Cerebral infarction due to embolism of right carotid artery           | S02.64XB,<br>S02.640B, |

|           |         |                                                                                                  |                                     |
|-----------|---------|--------------------------------------------------------------------------------------------------|-------------------------------------|
| ICD-10 DX | I63.132 | Cerebral infarction due to embolism of left carotid artery                                       | S02.641A,<br>S02.641B,              |
| ICD-10 DX | I63.139 | Cerebral infarction due to embolism of unspecified carotid artery                                | S02.642A,<br>S02.642B,              |
| ICD-10 DX | I63.19  | Cerebral infarction due to embolism of other precerebral artery                                  | S02.65XA,<br>S02.650A,              |
| ICD-10 DX | I63.20  | Cerebral infarction due to unspecified occlusion or stenosis of unspecified precerebral arteries | S02.65XB,<br>S02.650B,              |
| ICD-10 DX | I63.211 | Cerebral infarction due to unspecified occlusion or stenosis of right vertebral artery           | S02.651A,<br>S02.651B,              |
| ICD-10 DX | I63.212 | Cerebral infarction due to unspecified occlusion or stenosis of left vertebral artery            | S02.652A,<br>S02.652B,              |
| ICD-10 DX | I63.213 | Cerebral infarction due to unspecified occlusion or stenosis of bilateral vertebral arteries     | S02.66XA,<br>S02.66XB,              |
| ICD-10 DX | I63.219 | Cerebral infarction due to unspecified occlusion or stenosis of unspecified vertebral artery     | S02.67XA,<br>S02.670A,<br>S02.670B, |
| ICD-10 DX | I63.22  | Cerebral infarction due to unspecified occlusion or stenosis of basilar artery                   | S02.671A,<br>S02.671B,              |
| ICD-10 DX | I63.231 | Cerebral infarction due to unspecified occlusion or stenosis of right carotid arteries           | S02.672A,<br>S02.672B,              |
| ICD-10 DX | I63.232 | Cerebral infarction due to unspecified occlusion or stenosis of left carotid arteries            | S02.69XA,<br>S02.61XB,              |
| ICD-10 DX | I63.233 | Cerebral infarction due to unspecified occlusion or stenosis of bilateral carotid arteries       | S02.62XA,<br>S02.63XA,              |
| ICD-10 DX | I63.239 | Cerebral infarction due to unspecified occlusion or stenosis of unspecified carotid artery       | S02.64XA,<br>S02.65XA,              |
| ICD-10 DX | I63.29  | Cerebral infarction due to unspecified occlusion or stenosis of other precerebral arteries       | S02.66XA,<br>S02.67XB,              |
| ICD-10 DX | I63.30  | Cerebral infarction due to thrombosis of unspecified cerebral artery                             | S02.69XB,                           |

|           |         |                                                                                |                        |
|-----------|---------|--------------------------------------------------------------------------------|------------------------|
| ICD-10 DX | I63.311 | Cerebral infarction due to thrombosis of right middle cerebral artery          | S02.8XXA,<br>S02.80XA, |
| ICD-10 DX | I63.312 | Cerebral infarction due to thrombosis of left middle cerebral artery           | S02.8XXB,<br>S02.80XB, |
| ICD-10 DX | I63.313 | Cerebral infarction due to thrombosis of bilateral middle cerebral arteries    | S02.81XA,<br>S02.81XB, |
| ICD-10 DX | I63.319 | Cerebral infarction due to thrombosis of unspecified middle cerebral artery    | S02.82XA,<br>S02.82XB, |
| ICD-10 DX | I63.321 | Cerebral infarction due to thrombosis of right anterior cerebral artery        | S02.91XA,<br>S02.91XB, |
| ICD-10 DX | I63.322 | Cerebral infarction due to thrombosis of left anterior cerebral artery         | S02.92XA,<br>S02.92XB, |
| ICD-10 DX | I63.323 | Cerebral infarction due to thrombosis of bilateral anterior cerebral arteries  | S06.0X0A,<br>S06.0X1A, |
| ICD-10 DX | I63.329 | Cerebral infarction due to thrombosis of unspecified anterior cerebral artery  | S06.0X2A,<br>S06.0X3A, |
| ICD-10 DX | I63.331 | Cerebral infarction due to thrombosis of right posterior cerebral artery       | S06.0X4A,<br>S06.0X5A, |
| ICD-10 DX | I63.332 | Cerebral infarction due to thrombosis of left posterior cerebral artery        | S06.0X6A,<br>S06.0X7A, |
| ICD-10 DX | I63.333 | Cerebral infarction due to thrombosis of bilateral posterior cerebral arteries | S06.0X8A,<br>S06.0X9A, |
| ICD-10 DX | I63.339 | Cerebral infarction due to thrombosis of unspecified posterior cerebral artery | S06.1X0A,<br>S06.1X1A, |
| ICD-10 DX | I63.341 | Cerebral infarction due to thrombosis of right cerebellar artery               | S06.1X2A,<br>S06.1X3A, |
| ICD-10 DX | I63.342 | Cerebral infarction due to thrombosis of left cerebellar artery                | S06.1X4A,<br>S06.1X5A, |
| ICD-10 DX | I63.343 | Cerebral infarction due to thrombosis of bilateral cerebellar arteries         | S06.1X6A,<br>S06.1X7A, |



|           |         |                                                                              |                        |
|-----------|---------|------------------------------------------------------------------------------|------------------------|
| ICD-10 DX | I63.349 | Cerebral infarction due to thrombosis of unspecified cerebellar artery       | S06.1X8A,<br>S06.1X9A, |
| ICD-10 DX | I63.39  | Cerebral infarction due to thrombosis of other cerebral artery               | S06.2X0A,<br>S06.2X1A, |
| ICD-10 DX | I63.40  | Cerebral infarction due to embolism of unspecified cerebral artery           | S06.2X2A,<br>S06.2X3A, |
| ICD-10 DX | I63.411 | Cerebral infarction due to embolism of right middle cerebral artery          | S06.2X4A,<br>S06.2X5A, |
| ICD-10 DX | I63.412 | Cerebral infarction due to embolism of left middle cerebral artery           | S06.2X6A,<br>S06.2X7A, |
| ICD-10 DX | I63.413 | Cerebral infarction due to embolism of bilateral middle cerebral arteries    | S06.2X8A,<br>S06.2X9A, |
| ICD-10 DX | I63.419 | Cerebral infarction due to embolism of unspecified middle cerebral artery    | S06.2X0B,<br>S06.2X1B, |
| ICD-10 DX | I63.421 | Cerebral infarction due to embolism of right anterior cerebral artery        | S06.2X2B,<br>S06.2X3B, |
| ICD-10 DX | I63.422 | Cerebral infarction due to embolism of left anterior cerebral artery         | S06.2X4B,<br>S06.2X5B, |
| ICD-10 DX | I63.423 | Cerebral infarction due to embolism of bilateral anterior cerebral arteries  | S06.2X6B,<br>S06.2X7B, |
| ICD-10 DX | I63.429 | Cerebral infarction due to embolism of unspecified anterior cerebral artery  | S06.2X8B,<br>S06.2X9B, |
| ICD-10 DX | I63.431 | Cerebral infarction due to embolism of right posterior cerebral artery       | S06.300A,<br>S06.301A, |
| ICD-10 DX | I63.432 | Cerebral infarction due to embolism of left posterior cerebral artery        | S06.302A,<br>S06.303A, |
| ICD-10 DX | I63.433 | Cerebral infarction due to embolism of bilateral posterior cerebral arteries | S06.304A,<br>S06.305A, |
| ICD-10 DX | I63.439 | Cerebral infarction due to embolism of unspecified posterior cerebral artery | S06.306A,<br>S06.307A, |

|           |         |                                                                                                      |                        |
|-----------|---------|------------------------------------------------------------------------------------------------------|------------------------|
| ICD-10 DX | I63.441 | Cerebral infarction due to embolism of right cerebellar artery                                       | S06.308A,<br>S06.309A, |
| ICD-10 DX | I63.442 | Cerebral infarction due to embolism of left cerebellar artery                                        | S06.310A,<br>S06.311A, |
| ICD-10 DX | I63.443 | Cerebral infarction due to embolism of bilateral cerebellar arteries                                 | S06.312A,<br>S06.313A, |
| ICD-10 DX | I63.449 | Cerebral infarction due to embolism of unspecified cerebellar artery                                 | S06.314A,<br>S06.315A, |
| ICD-10 DX | I63.49  | Cerebral infarction due to embolism of other cerebral artery                                         | S06.316A,<br>S06.317A, |
| ICD-10 DX | I63.50  | Cerebral infarction due to unspecified occlusion or stenosis of unspecified cerebral artery          | S06.318A,<br>S06.319A, |
| ICD-10 DX | I63.511 | Cerebral infarction due to unspecified occlusion or stenosis of right middle cerebral artery         | S06.320A,<br>S06.321A, |
| ICD-10 DX | I63.512 | Cerebral infarction due to unspecified occlusion or stenosis of left middle cerebral artery          | S06.322A,<br>S06.323A, |
| ICD-10 DX | I63.513 | Cerebral infarction due to unspecified occlusion or stenosis of bilateral middle cerebral arteries   | S06.324A,<br>S06.325A, |
| ICD-10 DX | I63.519 | Cerebral infarction due to unspecified occlusion or stenosis of unspecified middle cerebral artery   | S06.326A,<br>S06.327A, |
| ICD-10 DX | I63.521 | Cerebral infarction due to unspecified occlusion or stenosis of right anterior cerebral artery       | S06.328A,<br>S06.329A, |
| ICD-10 DX | I63.522 | Cerebral infarction due to unspecified occlusion or stenosis of left anterior cerebral artery        | S06.330A,<br>S06.331A, |
| ICD-10 DX | I63.523 | Cerebral infarction due to unspecified occlusion or stenosis of bilateral anterior cerebral arteries | S06.332A,<br>S06.333A, |
| ICD-10 DX | I63.529 | Cerebral infarction due to unspecified occlusion or stenosis of unspecified anterior cerebral artery | S06.334A,<br>S06.335A, |
| ICD-10 DX | I63.531 | Cerebral infarction due to unspecified occlusion or stenosis of right posterior cerebral artery      | S06.336A,<br>S06.337A, |

|           |         |                                                                                                       |                                     |
|-----------|---------|-------------------------------------------------------------------------------------------------------|-------------------------------------|
| ICD-10 DX | I63.532 | Cerebral infarction due to unspecified occlusion or stenosis of left posterior cerebral artery        | S06.338A,<br>S06.339A,              |
| ICD-10 DX | I63.533 | Cerebral infarction due to unspecified occlusion or stenosis of bilateral posterior cerebral arteries | S06.340A,<br>S06.341A,              |
| ICD-10 DX | I63.539 | Cerebral infarction due to unspecified occlusion or stenosis of unspecified posterior cerebral artery | S06.342A,<br>S06.343A,<br>S06.344A, |
| ICD-10 DX | I63.541 | Cerebral infarction due to unspecified occlusion or stenosis of right cerebellar artery               | S06.345A,<br>S06.346A,              |
| ICD-10 DX | I63.542 | Cerebral infarction due to unspecified occlusion or stenosis of left cerebellar artery                | S06.347A,<br>S06.348A,              |
| ICD-10 DX | I63.543 | Cerebral infarction due to unspecified occlusion or stenosis of bilateral cerebellar arteries         | S06.349A,<br>S06.350A,              |
| ICD-10 DX | I63.549 | Cerebral infarction due to unspecified occlusion or stenosis of unspecified cerebellar artery         | S06.351A,<br>S06.352A,              |
| ICD-10 DX | I63.59  | Cerebral infarction due to unspecified occlusion or stenosis of other cerebral artery                 | S06.353A,<br>S06.354A,              |
| ICD-10 DX | I63.6   | Cerebral infarction due to cerebral venous thrombosis, nonpyogenic                                    | S06.355A,<br>S06.356A,              |
| ICD-10 DX | I63.89  | Other cerebral infarction                                                                             | S06.357A,                           |
| ICD-10 DX | I63.9   | Cerebral infarction, unspecified                                                                      | S06.358A,<br>S06.359A,              |
| ICD-10 DX | I66.01  | Occlusion and stenosis of right middle cerebral artery                                                | S06.360A,<br>S06.361A,              |
| ICD-10 DX | I66.02  | Occlusion and stenosis of left middle cerebral artery                                                 | S06.362A,<br>S06.363A,              |
| ICD-10 DX | I66.03  | Occlusion and stenosis of bilateral middle cerebral arteries                                          | S06.364A,<br>S06.365A,              |
| ICD-10 DX | I66.09  | Occlusion and stenosis of unspecified middle cerebral artery                                          | S06.366A,<br>S06.367A,              |
| ICD-10 DX | I66.11  | Occlusion and stenosis of right anterior cerebral artery                                              | S06.368A,                           |

|           |         |                                                                     |                        |
|-----------|---------|---------------------------------------------------------------------|------------------------|
| ICD-10 DX | I66.12  | Occlusion and stenosis of left anterior cerebral artery             | S06.369A,<br>S06.370A, |
| ICD-10 DX | I66.13  | Occlusion and stenosis of bilateral anterior cerebral arteries      | S06.371A,<br>S06.372A, |
| ICD-10 DX | I66.19  | Occlusion and stenosis of unspecified anterior cerebral artery      | S06.373A,<br>S06.374A, |
| ICD-10 DX | I66.21  | Occlusion and stenosis of right posterior cerebral artery           | S06.375A,<br>S06.376A, |
| ICD-10 DX | I66.22  | Occlusion and stenosis of left posterior cerebral artery            | S06.377A,<br>S06.378A, |
| ICD-10 DX | I66.23  | Occlusion and stenosis of bilateral posterior cerebral arteries     | S06.379A,<br>S06.380A, |
| ICD-10 DX | I66.29  | Occlusion and stenosis of unspecified posterior cerebral artery     | S06.381A,<br>S06.382A, |
| ICD-10 DX | I66.3   | Occlusion and stenosis of cerebellar arteries                       | S06.383A,              |
| ICD-10 DX | I66.8   | Occlusion and stenosis of other cerebral arteries                   | S06.384A,<br>S06.385A, |
| ICD-10 DX | I66.9   | Occlusion and stenosis of unspecified cerebral artery               | S06.386A,<br>S06.387A, |
| ICD-10 DX | I67.841 | Reversible cerebrovascular vasoconstriction syndrome                | S06.388A,<br>S06.389A, |
| ICD-10 DX | I67.848 | Other cerebrovascular vasospasm and vasoconstriction                | S06.4X0A,<br>S06.4X1A, |
| ICD-10 DX | I67.89  | Other cerebrovascular disease                                       | S06.4X2A,<br>S06.4X3A, |
| ICD-10 DX | I97.810 | Intraoperative cerebrovascular infarction during cardiac surgery    | S06.4X4A,<br>S06.4X5A, |
| ICD-10 DX | I97.811 | Intraoperative cerebrovascular infarction during other surgery      | S06.4X6A,<br>S06.4X7A, |
| ICD-10 DX | I97.820 | Postprocedural cerebrovascular infarction following cardiac surgery | S06.4X8A,<br>S06.4X9A, |
| ICD-10 DX | I97.821 | Postprocedural cerebrovascular infarction following other surgery   |                        |

S06.5X0A,  
S06.5X1A,  
S06.5X2A,  
S06.5X3A,  
S06.5X4A,  
S06.5X5A,  
S06.5X6A,  
S06.5X7A,  
S06.5X8A,  
S06.5X9A,  
S06.6X0A,  
S06.6X1A,  
S06.6X2A,  
S06.6X3A,  
S06.6X4A,  
S06.6X5A,  
S06.6X6A,  
S06.6X7A,  
S06.6X8A,  
S06.6X9A,  
S06.810A,  
S06.811A,  
S06.812A,  
S06.813A,  
S06.814A,  
S06.815A,  
S06.816A,  
S06.817A,  
S06.818A,  
S06.819A,  
S06.820A,

---

S06.821A,  
S06.822A,  
S06.823A,  
S06.824A,  
S06.825A,  
S06.826A,  
S06.827A,  
S06.828A,  
S06.829A,  
S06.890A,  
S06.891A,  
S06.892A,  
S06.893A,  
S06.894A,  
S06.895A,  
S06.896A,  
S06.897A,  
S06.898A,  
S06.899A,  
S06.9X0A,  
S06.9X1A,  
S06.9X2A,  
S06.9X3A,  
S06.9X4A,  
S06.9X5A,  
S06.9X6A,  
S06.9X7A,  
S06.9X8A,  
S06.9X9A, OR  
Z51.89 as the  
principal DX

---

|           |                                           |                                 |        | Code then<br>EXCLUDE.                                                                             |
|-----------|-------------------------------------------|---------------------------------|--------|---------------------------------------------------------------------------------------------------|
| H         | Multi-organ failure                       | ICD-9 DX                        | 995.94 | Systemic inflammatory response syndrome due to noninfectious process with acute organ dysfunction |
|           |                                           | ICD-10 DX                       | R65.1x | Systemic inflammatory response syndrome (SIRS) of non-infectious origin                           |
| I         | Infection/sepsis (including septic shock) | ICD-9 DX                        | 038.xx | Septicemia                                                                                        |
|           |                                           | ICD-9 DX                        | 472.1  | Chronic Pharyngitis                                                                               |
|           |                                           | ICD-9 DX                        | 785.50 | Unspecified Shock                                                                                 |
|           |                                           | ICD-9 DX                        | 785.52 | Septic shock                                                                                      |
|           |                                           | ICD-9 DX                        | 790.7  | Bacteremia                                                                                        |
|           |                                           | ICD-9 DX                        | 421.0  | Acute and subacute bacterial endocarditis                                                         |
|           |                                           | ICD-9 DX                        | 421.9  | Acute endocarditis, unspecified                                                                   |
|           |                                           | ICD-9 DX                        | 424.9x | Endocarditis, valve unspecified                                                                   |
|           |                                           | ICD-9 DX                        | 995.91 | Sepsis                                                                                            |
|           |                                           | ICD-9 DX                        | 995.92 | Severe sepsis                                                                                     |
|           |                                           | ICD-9 DX                        | 998.5  | Other complications of procedures, NEC; postoperative infection                                   |
|           |                                           | ICD-9 DX                        | 998.59 | Other postoperative infection                                                                     |
|           |                                           | ICD-9 DX                        | 999.3x | Complications of medical care, not elsewhere classified; other infection                          |
|           |                                           | ICD-10 DX                       | A40.x  | Streptococcal sepsis                                                                              |
|           |                                           | ICD-10 DX                       | R65.2x | Severe sepsis                                                                                     |
|           |                                           | ICD-10 DX                       | R78.81 | Bacteremia                                                                                        |
|           |                                           | ICD-10 DX                       | I33.0  | Acute and subacute infective endocarditis                                                         |
|           |                                           | ICD-10 DX                       | I33.9  | Acute and subacute endocarditis, unspecified                                                      |
| ICD-10 DX | I38                                       | Endocarditis, valve unspecified |        |                                                                                                   |
| ICD-10 DX | A41.xx                                    | Other sepsis                    |        |                                                                                                   |

|           |                       |           |            |                                                       |
|-----------|-----------------------|-----------|------------|-------------------------------------------------------|
|           |                       | ICD-10 DX | T81.4xxx   | Infection following a procedure                       |
|           |                       | ICD-10 DX | K68.11     | Postprocedural retroperitoneal abscess                |
|           |                       | ICD-10 DX | T81.12xx   | Postprocedural septic shock                           |
| J         | Altered mental status | ICD-10 DX | R41.82     | Altered mental status, unspecified                    |
|           |                       | ICD-10 DX | R41.0      | Disorientation unspecified                            |
|           |                       | ICD-10 DX | R40.0      | Somnolence                                            |
|           |                       | ICD-10 DX | R40.1      | Stupor                                                |
|           |                       | ICD-10 DX | R40.2      | Coma                                                  |
|           |                       | ICD-10 DX | R40.4      | Transient alteration of awareness                     |
| K         | Fever                 | ICD-9 DX  | 780.60     | Fever, unspecified                                    |
|           |                       | ICD-9 DX  | 780.61     | Fever presenting with conditions classified elsewhere |
|           |                       | ICD-9 DX  | 780.62     | Postprocedural fever                                  |
|           |                       | ICD-10 DX | R50.81     | Fever presenting with conditions classified elsewhere |
|           |                       | ICD-10 DX | R50.82     | Postprocedural fever                                  |
|           |                       | L         | Chest pain | ICD-10 DX                                             |
| ICD-10 DX | R07.89                |           |            | Other chest pain                                      |
| M         | Dysphagia             | ICD-10 DX | R13.1      | Dysphagia                                             |
|           |                       | ICD-10 DX | R13.19     | Other dysphagia                                       |
|           |                       | ICD-10 DX | R13.10     | Dysphagia unspecified                                 |
|           |                       | ICD-10 DX | R13.14     | Dysphagia pharyngoesophageal phase                    |
|           |                       | ICD-10 DX | K21.0      | GERD with Esophagitis                                 |



**Appendix Table 3.**

| <b>Definition</b>    | <b>Code Logic</b>                                                                                            |
|----------------------|--------------------------------------------------------------------------------------------------------------|
| Definite AEF         | (A1 or A2) AND Death<br>or<br>(B or C) AND (A1 or A2 or D or E or F)                                         |
| Highly Probable AEF  | (B or C) AND (G or H or I or J or K or L or M)<br>or<br>(D or E or F) AND Death<br>or<br>(G and I) AND Death |
| Sensitivity Analysis | (A1 or A2 or D or E or F or G or H or I or J or K or L or M)<br>Any 2 of the above                           |
